# Supplementary material for: A single-cell atlas of the healthy breast tissues reveals clinically relevant clusters of breast epithelial cells
Source: PubMed Central journal article supplement — Cell Rep Med. 2021 Mar 16;2(3):100219. doi: 10.1016/j.xcrm.2021.100219 (PMC7974552; doi:10.1016/j.xcrm.2021.100219), 2021-03-16
Supplement: mmc1.pdf [file mmc1.pdf]

**Cell Reports Medicine, Volume 2**

**Supplemental information**

**A single-cell atlas of the healthy  
breast tissues reveals clinically relevant  
clusters of breast epithelial cells**

**Poornima Bhat-Nakshatri, Hongyu Gao, Liu Sheng, Patrick C. McGuire, Xiaoling Xuei, Jun Wan, Yunlong Liu, Sandra K. Althouse, Austyn Colter, George Sandusky, Anna Maria Storniolo, and Harikrishna Nakshatri**

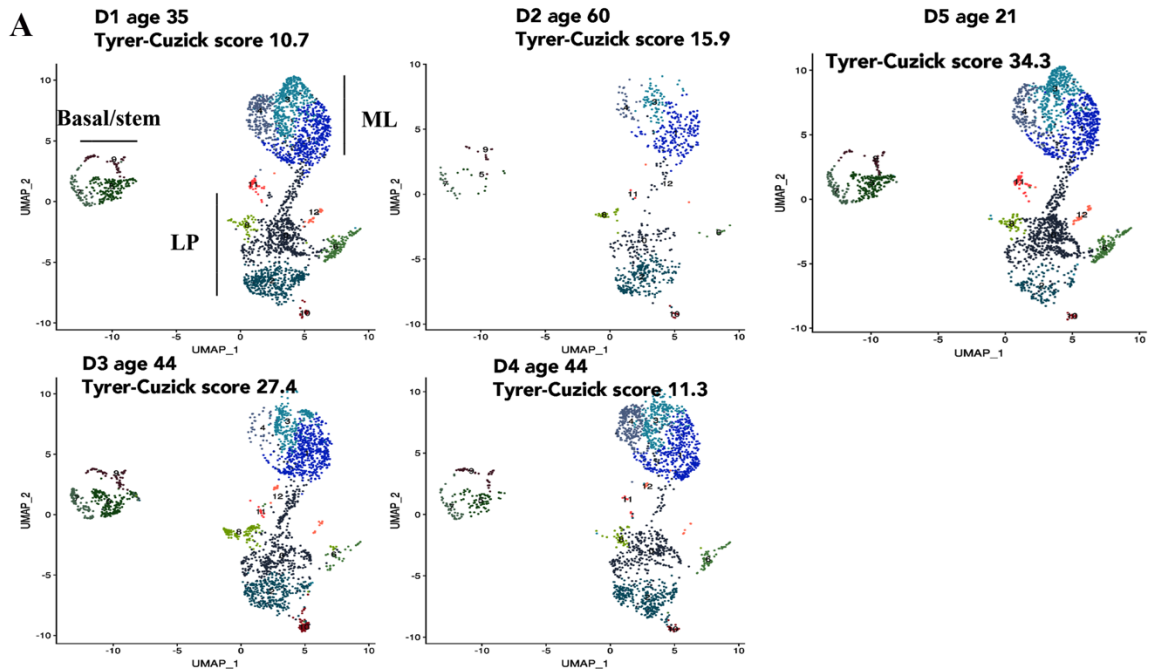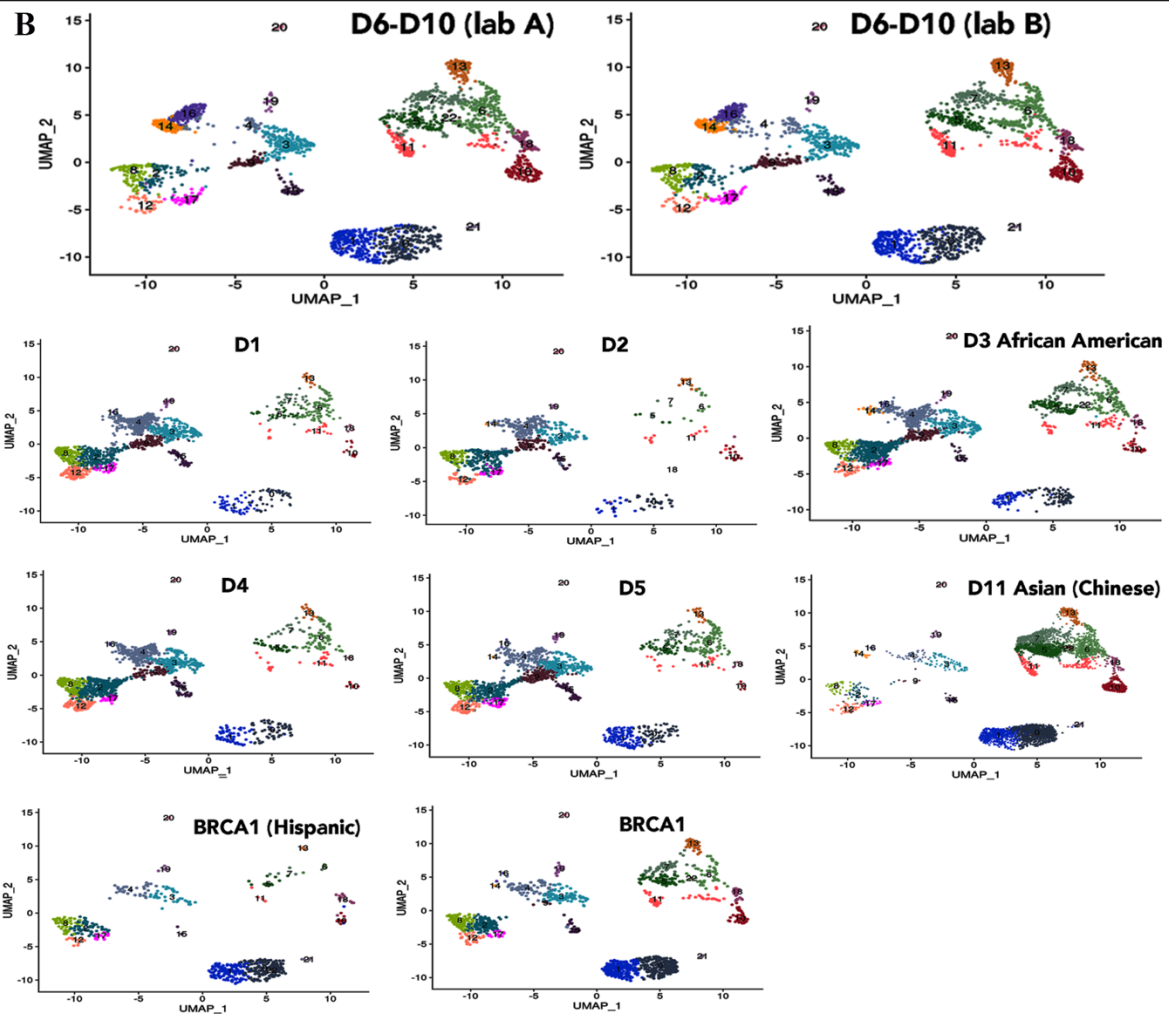

**Figure S1: Epithelial clusters in individual samples.** A) Epithelial cell clusters in breast tissues of D1 to D5. B) Epithelial cell clusters in first five samples sequenced individually, additional samples sequenced as a pool in two labs (D6-D10), individual sample from an Asian (Chinese), and a BRCA1 mutation carrier. Clustering was done with Seurat and Loupe browser was used to explore various gene expression. Related to Figures 1 and 4.

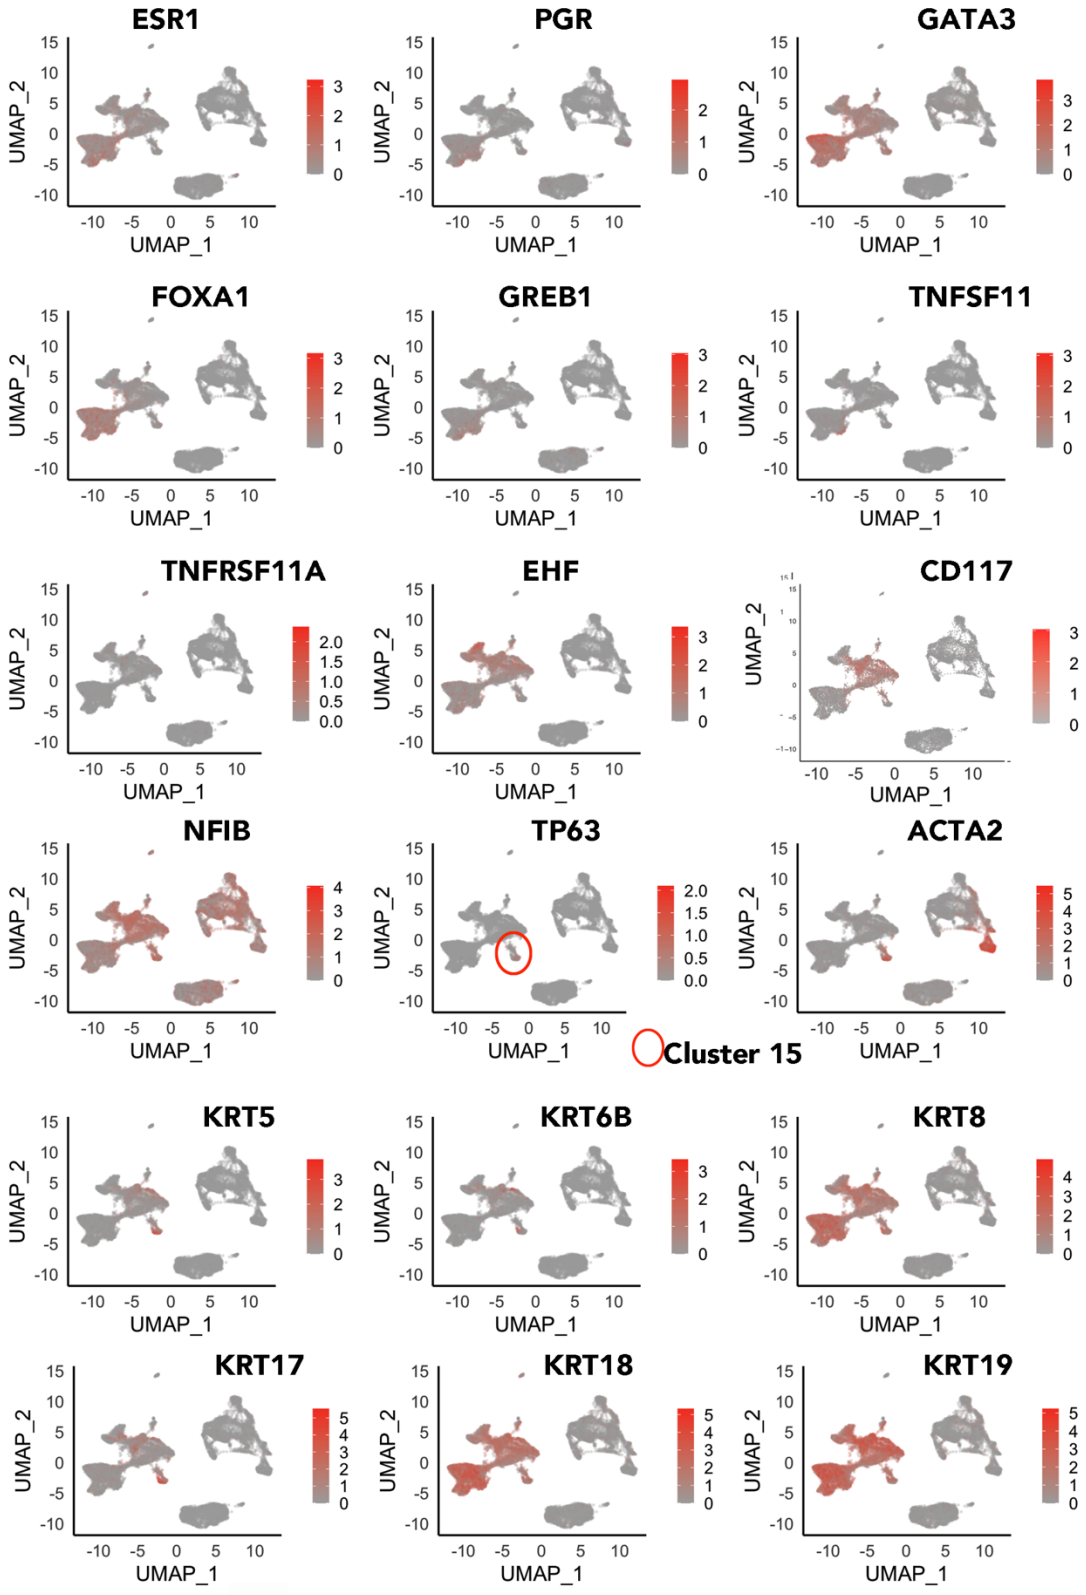

**Figure S2: Expression patterns of known mature luminal (ML), luminal progenitor (LP) and basal/stem/myoepithelial cell-enriched marker genes and different keratins in various clusters. Related to Figure 4.**

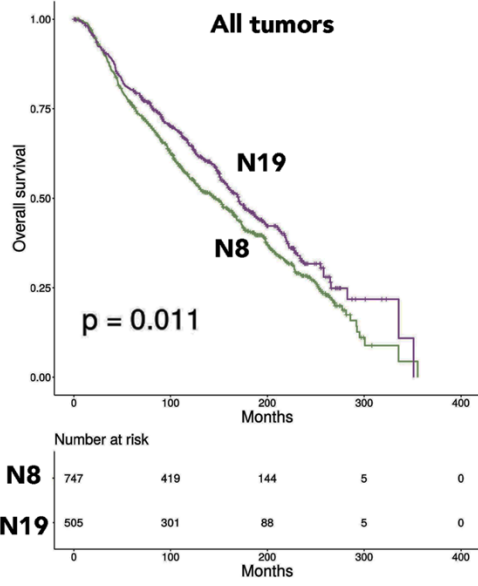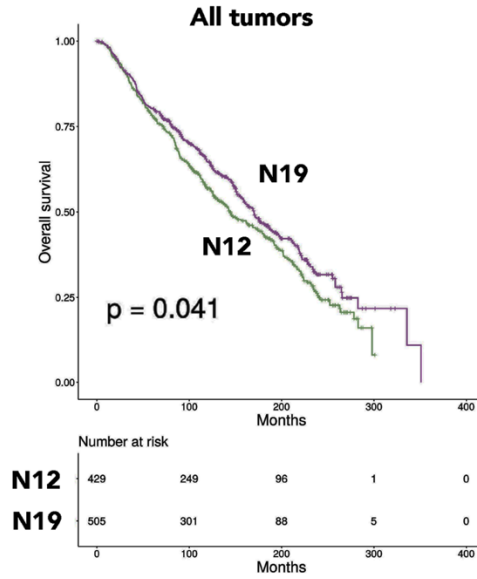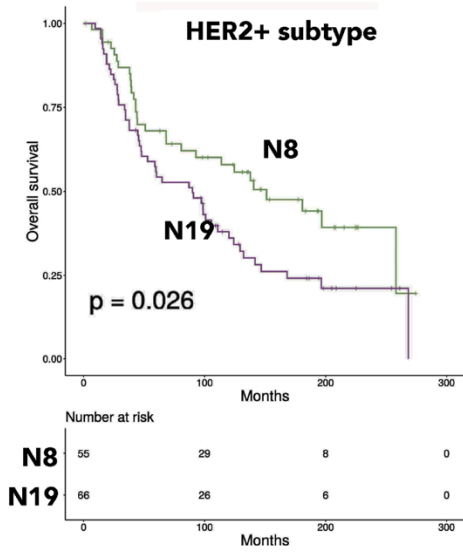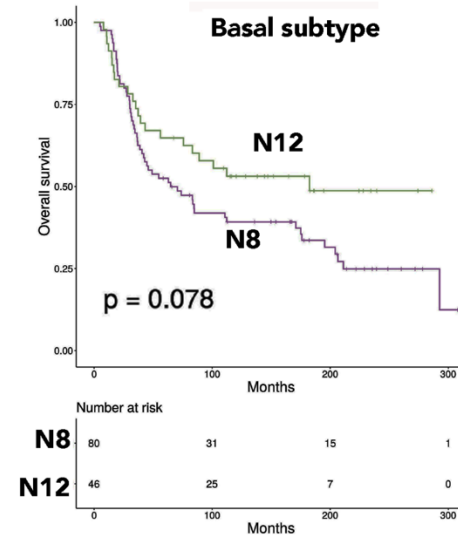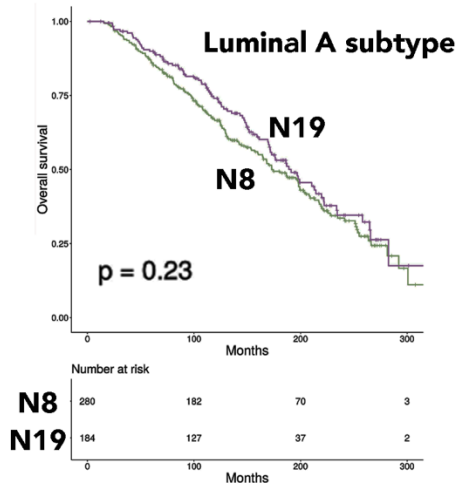

**Figure S3: Prognostic value of cluster-enriched genes in various intrinsic subtypes of breast cancer.** Data were generated using METABRIC datasets. Related to Figure 4.

**Table S1: Information on breast tissue donors.** Related to data presented in Figures 1 and 4

| <b>Donor number</b> | <b>Race/ethnicity</b>         | <b>Age</b> | <b>BMI</b> | <b>Gender</b> | <b>Times pregnant</b> | <b>Family history of BC</b>  | <b>Tyrer-Cuzick-lifetime risk score</b> |
|---------------------|-------------------------------|------------|------------|---------------|-----------------------|------------------------------|-----------------------------------------|
| D1                  | White- non-Hispanic or Latina | 35         | 24.5       | Female        | 1                     | NA                           | 10.7                                    |
| D2                  | White- non-Hispanic or Latina | 60         | 24.9       | Female        | 4                     | Sisters                      | 15.9                                    |
| D3                  | African American              | 44         | 29         | Female        | 4                     | Mother, Grandmother and Aunt | 27.4                                    |
| D4                  | White- non-Hispanic or Latina | 42         | 27.8       | Female        | 1                     | No                           | 11.3                                    |
| D5                  | White- non-Hispanic or Latina | 21         | 35.4       | Female        | 0                     | Paternal Grandmother         | 34.3                                    |
| D6                  | White- non-Hispanic or Latina | 33         | 23.4       | Female        | 2                     | Paternal Grandmother         | 20.1                                    |
| D7                  | White- non-Hispanic or Latina | 27         | 22.7       | Female        | 0                     | No                           | 14.8                                    |
| D8                  | White- non-Hispanic or Latina | 56         | 23.5       | Female        | 3                     | No                           | 8.8                                     |
| D9                  | White- non-Hispanic or Latina | 24         | 30.5       | Female        | 3                     | NA                           | 12.0                                    |
| D10                 | White- non-Hispanic or Latina | 34         | 26.8       | Female        | 2                     | No                           | 14.3                                    |
| D11                 | Asian                         | 43         | 25.6       | Female        | 3                     | Mother                       | 13                                      |

NA=Not available.

Tyrer-Cuzick score >20 indicates higher risk.



**Table S4:** Overlap in gene expression between clusters of two analyses. Related to Figures 1, 4 and 6A.

| Analysis-2 clusters | Peak similarity to analysis 1 | P value of overlap | Differentiation status in both sets of analyses | Number of samples in TCGA with cluster-specific gene expression enrichment | Number of samples in METABRIC with cluster-specific gene expression enrichment |
|---------------------|-------------------------------|--------------------|-------------------------------------------------|----------------------------------------------------------------------------|--------------------------------------------------------------------------------|
| N0                  | C12                           | 1.63E-58           | Luminal progenitor                              | 34                                                                         | 58                                                                             |
| N1                  | C12                           | 2.28E-60           | Luminal progenitor                              | 9                                                                          | 38                                                                             |
| N2                  | C1,3,4                        | 2.40E-148          | Mature luminal                                  |                                                                            |                                                                                |
| N3                  | C0                            | 6.30E-182          | Luminal progenitor                              | 8                                                                          | 36                                                                             |
| N4                  | C2                            | 8.38E-95           | Luminal Progenitor                              | 47                                                                         |                                                                                |
| N5                  | C5,7,9                        | 1.90E-235          | Basal                                           |                                                                            |                                                                                |
| N6                  | C5,7,9                        | 1.40E-106          | Basal                                           |                                                                            |                                                                                |
| N7                  | C5,7,9                        | 8.80E-138          | Basal                                           |                                                                            |                                                                                |
| N8                  | C1,3,4                        | 6.80E-168          | Mature luminal                                  | 44                                                                         | 748                                                                            |
| N9                  | C5,7,9                        | 4.5E-294           | Luminal progenitor/Basal                        |                                                                            |                                                                                |
| N10                 | C5,7,9                        | 6.12E-40           | Basal                                           |                                                                            |                                                                                |
| N11                 | C5,7,9                        | 2.60E-183          | Basal                                           |                                                                            |                                                                                |
| N12                 | C1,3,4                        | 1.46E-89           | Mature luminal                                  | 185                                                                        | 429                                                                            |
| N13                 | C5,7,9                        | 1.3E-160           | Basal                                           | 8                                                                          |                                                                                |
| N14                 | C6                            | 1.68E-63           | Luminal progenitor                              |                                                                            |                                                                                |
| N15                 | C5,7,9                        | 4.16E-41           | Luminal progenitor/basal                        | 43                                                                         | 88                                                                             |
| N16                 | C5,7,9                        | 1.7E-299           | Luminal progenitor/basal                        |                                                                            |                                                                                |
| N17                 | C1,3,4                        | 1.20E-107          | Mature luminal                                  | 615                                                                        |                                                                                |
| N18                 | C5,7,9                        | <5.00e-324         | Basal                                           |                                                                            |                                                                                |
| N19                 | C11                           | 2.23E-75           | Luminal progenitor                              | 90                                                                         | 505                                                                            |
| N20                 | C5,7,9                        | 1.23E-81           | Basal                                           |                                                                            |                                                                                |
| N21                 | C5,7,9                        | 3.00E-256          | Basal                                           |                                                                            |                                                                                |
| N22                 | C5,7,9                        | <5.00e-324         | Basal                                           |                                                                            |                                                                                |

**Table S5: Overall survival- PROC PHREG with PDK4 and TBX3 H-scores as dichotomous variable in multivariable models. Related to Figure 7.**

| Obs | Group                        | H-Score Category Parameter* | p-value       | PDK4           |                                 |                                 | TBX3          |                |                                 |                                 |
|-----|------------------------------|-----------------------------|---------------|----------------|---------------------------------|---------------------------------|---------------|----------------|---------------------------------|---------------------------------|
|     |                              |                             |               | Point Estimate | Lower 95% Wald Confidence Limit | Upper 95% Wald Confidence Limit | p-value       | Point Estimate | Lower 95% Wald Confidence Limit | Upper 95% Wald Confidence Limit |
| 1   | OS                           | High vs Low                 | <b>0.0431</b> | 1.382          | 1.010                           | 1.890                           | <b>0.0333</b> | 0.721          | 0.533                           | 0.974                           |
| 2   | OS for ER+                   | High vs Low                 | <b>0.0131</b> | 1.600          | 1.104                           | 2.319                           | 0.1884        | 0.789          | 0.554                           | 1.123                           |
| 3   | OS for ER-                   | High vs Low                 | 0.5535        | 1.239          | 0.610                           | 2.514                           | 0.0709        | 0.503          | 0.238                           | 1.060                           |
| 4   | OS for Endocrine Therapy=Yes | High vs Low                 | 0.0847        | 1.431          | 0.952                           | 2.152                           | 0.3786        | 0.837          | 0.564                           | 1.243                           |
| 5   | OS for Endocrine Therapy=No  | High vs Low                 | 0.0976        | 1.608          | 0.917                           | 2.822                           | 0.0505        | 0.589          | 0.346                           | 1.001                           |
| 6   | OS for ER+ and ET=Yes        | High vs Low                 | <b>0.0300</b> | 1.614          | 1.048                           | 2.488                           | 0.9396        | 0.983          | 0.637                           | 1.519                           |
| 7   | OS for ER+ and ET=No         | High vs Low                 | 0.1473        | 1.956          | 0.789                           | 4.847                           | <b>0.0323</b> | 0.422          | 0.191                           | 0.930                           |
| 8   | OS for ER- and ET=Yes        | High vs Low                 | 0.9707        | 0.961          | 0.117                           | 7.887                           | 0.3166        | 0.324          | 0.036                           | 2.939                           |
| 9   | OS for ER- and ET=No         | High vs Low                 | 0.2016        | 1.710          | 0.751                           | 3.893                           | 0.1874        | 0.559          | 0.235                           | 1.327                           |
| 10  | OS for ER+/PR+/HER2-=Yes     | High vs Low                 | 0.1131        | 1.510          | 0.907                           | 2.513                           | 0.4029        | 0.792          | 0.458                           | 1.368                           |
| 11  | OS for ER+/PR+/HER2-=No      | High vs Low                 | 0.7579        | 1.146          | 0.483                           | 2.717                           | <b>0.0036</b> | 0.250          | 0.099                           | 0.635                           |

\*referent group listed second

ET= Endocrine therapy

OS=Overall survival

Obs= Observations
